# Supplementary material for: Echocardiographic Parameters and the Risk of Incident Atrial Fibrillation: The Suita Study
Source: PubMed Central journal article supplement (PMC7064552; doi:10.2188/jea.je20180251), 2020-04-05
Supplement: je-30-183-s001.pdf [file je-30-183-s001.pdf]

**eTable 1.** Risks of LAD, LAV and LAVI increases for the incidence of AF in 667 participants: the Suita study

|                                             | n   | Cases | Range of the parameter mean (SD) | Age and sex-adjusted HR and 95% CI | Multivariable-adjusted HR and 95% CI |
|---------------------------------------------|-----|-------|----------------------------------|------------------------------------|--------------------------------------|
| Left atrial dimension, mm                   | 667 | 10    | 15.8–44.3<br>31.3 (4.8)          | 1.28 ( 1.10 – 1.50 )               | 1.22 ( 1.04 – 1.44 )                 |
| Left atrial volume, mL                      | 667 | 10    | 11.1–93.3<br>32.9 (11.1)         | 1.07 ( 1.03 – 1.12 )               | 1.06 ( 1.02 – 1.10 )                 |
| Left atrial volume index, mL/m <sup>2</sup> | 667 | 10    | 7.8–71.2<br>21.6 (7.3)           | 1.10 ( 1.04 – 1.17 )               | 1.10 ( 1.02 – 1.17 )                 |

AF, atrial fibrillation; BMI, body mass index; CI, confidence interval; HDL-C, high density lipoprotein-cholesterol; HR, hazard ratio; LAD, left atrial dimension; LAV, left atrial volume; LAVI, left atrial volume index; SD, standard deviation.

Multivariable-adjusted HR: age, sex, overweight (BMI  $\geq 25.0$  kg/m<sup>2</sup>), hypertension (systolic blood pressure  $\geq 140$  mm Hg and/or diastolic blood pressure  $\geq 90$  mm Hg and/or present medication for hypertension), current excessive alcohol drinking, and non-HDL-C.

**eTable 2.** Risks of 1-SD increase of LAD, LAV, and LAVI for the incidence of AF in 667 participants: the Suita study

|                                             | n   | Cases | Range of the parameter mean (SD) | Parameter increment | Age and sex-adjusted HR and 95% CI | Multivariable-adjusted HR and 95% CI |
|---------------------------------------------|-----|-------|----------------------------------|---------------------|------------------------------------|--------------------------------------|
| Left atrial dimension, mm                   | 667 | 10    | 15.8–44.3<br>31.3 (4.8)          | 4.8                 | 3.30 ( 1.58 – 6.89 )               | 2.63 ( 1.20 – 5.80 )                 |
| Left atrial volume, mL                      | 667 | 10    | 11.1–93.3<br>32.9 (11.1)         | 11.1                | 2.17 ( 1.38 – 3.42 )               | 1.94 ( 1.18 – 3.18 )                 |
| Left atrial volume index, mL/m <sup>2</sup> | 667 | 10    | 7.8–71.2<br>21.6 (7.3)           | 7.3                 | 2.00 ( 1.29 – 3.09 )               | 1.91 ( 1.17 – 3.12 )                 |

AF, atrial fibrillation; BMI, body mass index; CI, confidence interval; HDL-C, high density lipoprotein-cholesterol; HR, hazard ratio; LAD, left atrial dimension; LAV, left atrial volume; LAVI, left atrial volume index; SD, standard deviation.

Multivariable-adjusted HR: age, sex, overweight (BMI  $\geq 25.0$  kg/m<sup>2</sup>), hypertension (systolic blood pressure  $\geq 140$  mm Hg and/or diastolic blood pressure  $\geq 90$  mm Hg and/or present medication for hypertension), current excessive alcohol drinking, and non-HDL-C.

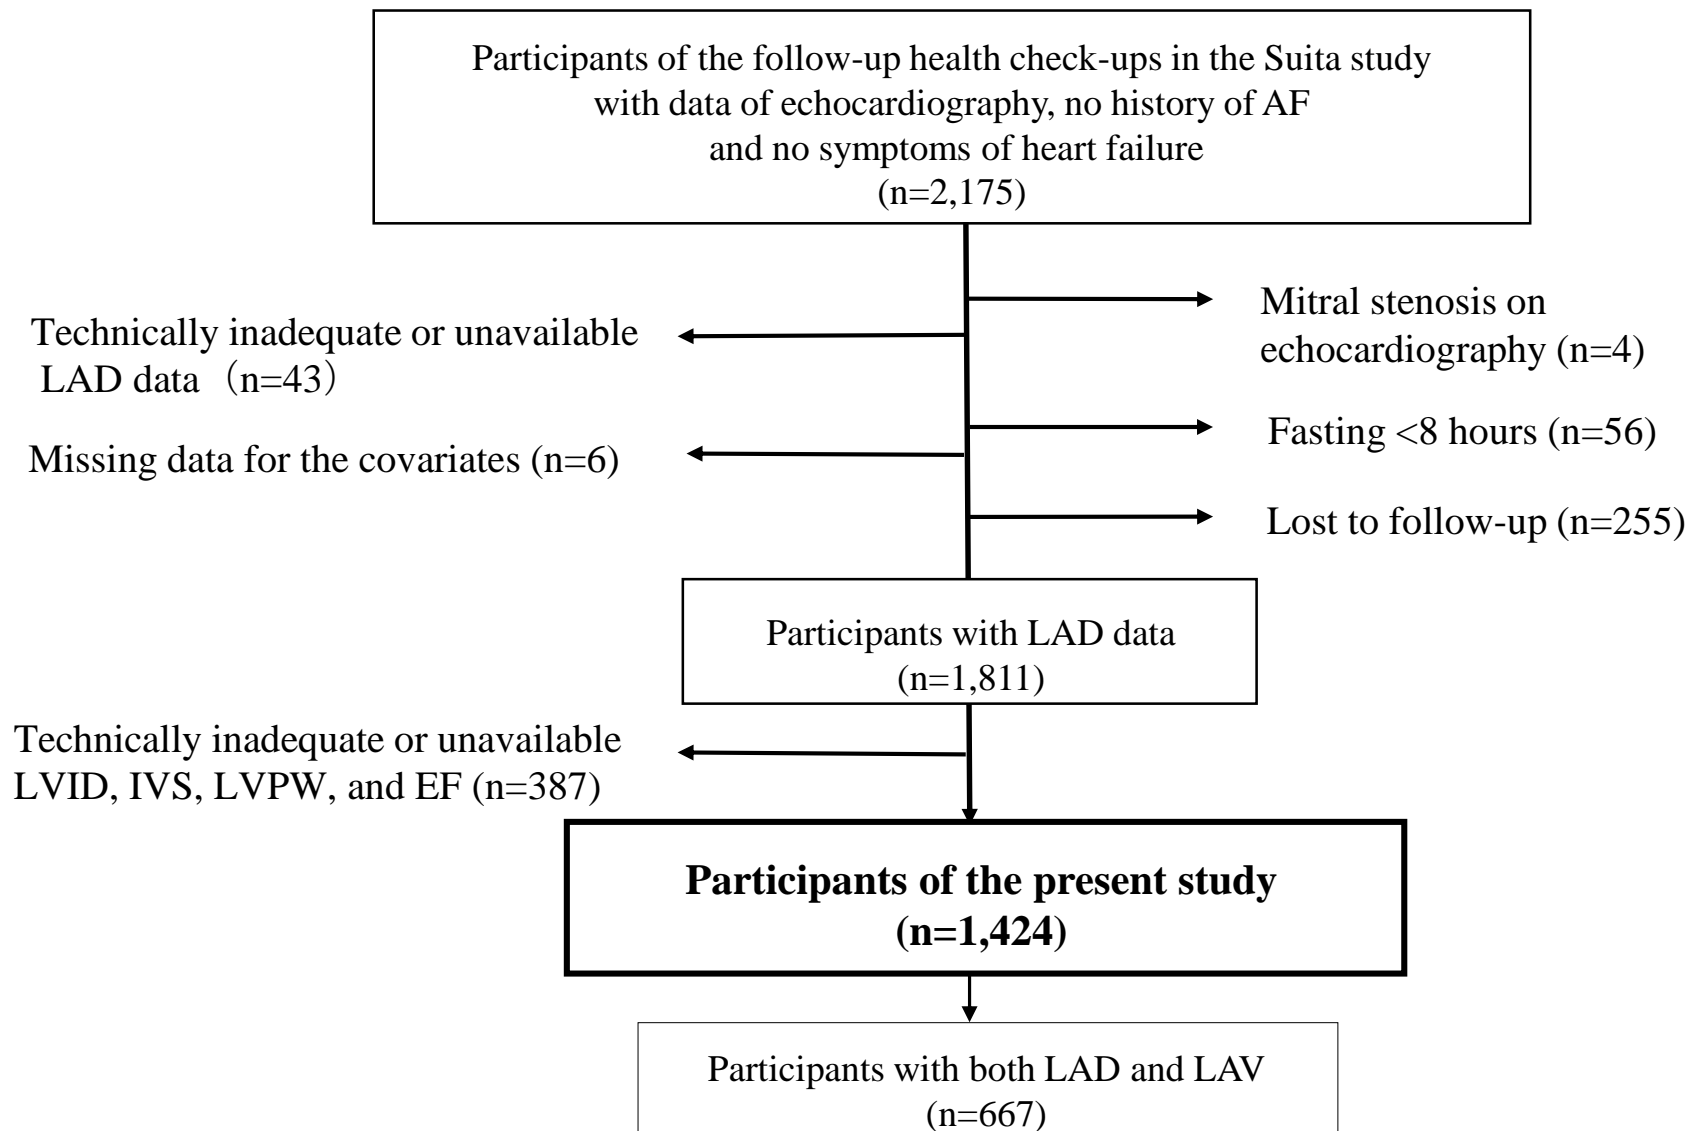

**eFigure 1.** Inclusion and exclusion criteria of participants: the Suita study in 2007–2018. AF: atrial fibrillation, LAD: left atrial dimension, LVID: left ventricular internal dimension, IVS: interventricular septum, LVPW: left ventricular posterior wall, EF: ejection fraction, LAV: left atrial volume.
